# Supplementary material for: Fragmentation of the mitochondrial network in skin in vivo
Source: PLoS One. 2017 Jun 23;12(6):e0174469. doi: 10.1371/journal.pone.0174469 (PMC5482427; doi:10.1371/journal.pone.0174469)
Supplement: S1 Dataset — (CSV) [file pone.0174469.s004.csv]

Cluster_Area_young	Cluster_Area_old	Cluster_Circularity_young	Cluster_Circularity_old	Cluster_number_young	Cluster_number_old	Cluster_Area_spinosum	Cluster_Area_granulosum	Cluster_Circularity_spinosum	Cluster_Circularity_granulosum	Cluster_number_spinosum	Cluster_number_granulosum
6,98075	7,24818	1,872	1,93764	355	356,81818	6,85692	9,32975	2,01315	2,10188	120,61538	208
8,13644	14,712	1,99811	2,40283	378,22222	207,33333	6,34027	4,948	1,90127	1,75967	259,54545	384
7,4939	6,77508	1,9135	1,86267	293,4	400,75	8,37229	8,88	2,08129	2	133,14286	192,28571
13,58591	5,13917	2,312	1,774	142,54545	575	11,41045	6,03478	2,213	1,85089	104	314
10,3748	8,86086	2,148	1,98671	235,7	232	10,57575	5,51067	2,251	1,80283	92,33333	307,83333
9,78088	14,29144	2,11512	2,32456	256,625	204,44444	4,5115	6,54943	1,8145	1,91671	151,5	268,14286
7,88825	9,9552	1,97963	2,0622	231,875	239,2	9,7145	7,62886	2,10038	1,96686	147,25	244,14286
8,93	7,39333	2,10556	1,90344	208,44444	340,44444	13,74586	9,61414	2,29029	2,08329	143,14286	191,14286
11,98763	5,9066	2,30788	1,8504	162,375	396,6	5,67682	5,6869	1,91818	1,8046	150	338,9
11,63067	5,39037	2,21233	1,80375	148	473,375	8,90563	9,36063	2,03425	2,05775	249,5	168,25
8,833	9,5628	2,027	2,0584	219	385,8	13,46244	6,10837	2,30211	1,87463	83,88889	308,625
6,99643	7,489	1,93371	2,194	426	366	11,8391	7,4142	2,2704	1,9831	91,8	266,2
9,24157	7,04783	1,98943	1,92333	203,71429	377,66667	8,904	5,88	2,18722	1,809	137,22222	257
6,44536	9,286	1,90064	2,04878	392,54545	360,88889	14,61275	6,029	2,41087	1,83767	86,75	279,33333
7,19187	6,9836	1,92113	1,9214	295,75	345,9	8,63733	6,91125	2,08	1,92113	200	275,125
13,26211	7,67138	2,25856	1,96212	137,11111	319,5	10,84478	5,65255	2,22422	1,85509	146,33333	447,45455
10,8595	8,12983	2,13933	1,9305	260,5	335,66667	6,49783	5,70467	1,97925	1,81711	121,5	364,66667
11,618	10,45222	2,20713	2,14111	254,375	261,22222	8,88391	6,8802	2,08673	1,9348	275	307,5
11,73173	11,576	2,24727	2,20733	141,18182	204,33333	12,2034	7,37817	2,3069	1,94717	88,7	256,16667
7,1684	8,47167	1,9144	1,96267	219	327	6,1979	8,55264	1,9284	2,03864	169,8	229,72727
8,34413	9,37433	2,00537	2,056	229,625	234,83333	4,70333	3,9414	1,86078	1,7148	256	545,6
7,77389	9,8946	1,95567	2,0512	271,22222	291,1	14,01725	6,7692	2,39275	1,8962	71,5	245,4
8,93517	10,87778	2,01533	2,11578	244,83333	259,33333	12,32556	8,91975	2,22433	2,02375	153,55556	224,5
7,42543	8,49825	1,944	1,983	391,14286	326,25	11,078	6,7275	2,2285	1,9152	135	328,3
10,46412	8,82818	2,10962	2,02982	212,125	285,90909	5,69183	6,4126	1,904	1,8544	151,41667	290
7,47543	7,53243	1,91114	1,959	357,42857	356,71429	6,612	10,9182	1,90786	2,1968	314,42857	159,6
6,5124	6,8583	1,864	1,8911	296,8	330,9	9,93342	9,72211	2,14908	2,15478	117,5	188,55556
11,37487	8,4445	2,19988	1,94425	147,75	279,75	9,25891	5,20309	2,17055	1,79364	127,09091	414,72727
10,12671	7,12711	2,108	1,92878	265,42857	408	6,9645	8,47986	1,9732	1,99771	145,7	215,14286
11,30875	12,34158	2,1555	2,19475	232,5	183,41667	9,07311	6,30843	2,09567	1,89957	210,77778	365,28571
5,6368	13,77338	1,8152	2,25763	237	200,75	5,926	8,28573	1,91389	2,01455	238,11111	259,63636
8,10633	8,6978	1,966	2,0556	241	284,6	8,0557	5,5206	2,051	1,8214	227,1	425,2
11,76175	10,63	2,23575	2,13311	179,125	222	13,73889	6,8415	2,40933	1,8938	93	334,3
8,40729	7,0455	2,01886	1,91637	249,57143	315,375	8,23	8,335	2,04756	2,01186	161,44444	253,14286
9,807	8,29525	2,04589	1,95925	242,88889	280,25	12,337	7,7158	2,22422	1,99	82	225,3
10,71283	6,65	2,14917	1,83067	247,5	367	7,0988	4,527	1,9478	1,76243	136,8	472,85714
6,9598	7,52845	1,9346	1,96918	280,6	318,63636	8,8552	7,86333	2,0712	1,9765	141,8	238,66667
8,86829	9,60045	2,02486	2,05391	267,42857	288	8,5835	8,12044	2,1545	1,97289	108	208,22222
12,53122	5,0104	2,26678	1,7471	130,33333	580,3	9,366	8,11686	2,16636	2,01157	137,54545	250,28571
9,44889	7,9138	2,01856	1,951	240,44444	363,4	11,67533	5,35927	2,16656	1,819	64,77778	367,45455
9,46325	10,91378	2,08188	2,16333	257,375	250,33333	15,9167	5,463	2,5211	1,81517	76,2	393,16667
13,20045	12,73142	2,33018	2,25367	147,90909	218,66667	5,19487	7,83	1,78775	1,97989	314,375	222,33333
10,26944	8,86967	2,11167	1,96467	203,22222	235,66667	13,40633	6,04633	2,31878	1,82833	64,44444	312,22222
10,26163	7,71571	2,08575	1,94086	199,25	337	8,4192	7,20586	2,0972	1,94329	128,1	269,71429
11,13483	8,92011	2,173	2,057	172	314,88889	6,2537	4,74088	1,9227	1,76638	143,6	434,875
8,8104	7,00283	1,99	1,9	279,2	288,33333	4,7705	4,624	1,75875	1,7395	420,25	363,25
7,196	8,845	1,9432	2,0372	309,6	290,8	8,2942	7,01544	2,1328	1,94056	120,8	292,44444
